# Supplementary material
Source: PubMed Central journal article supplement (PMC419676)

# Behavior during training

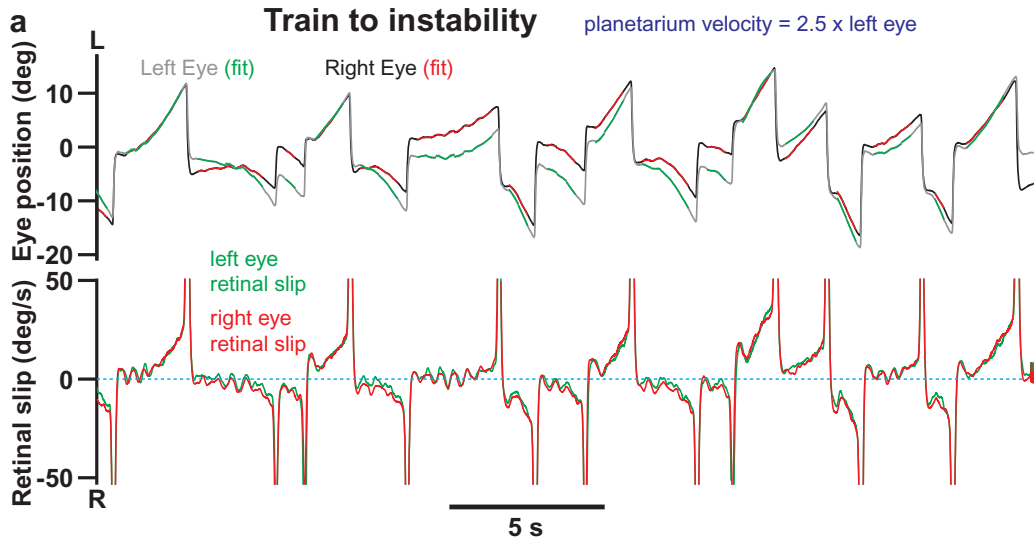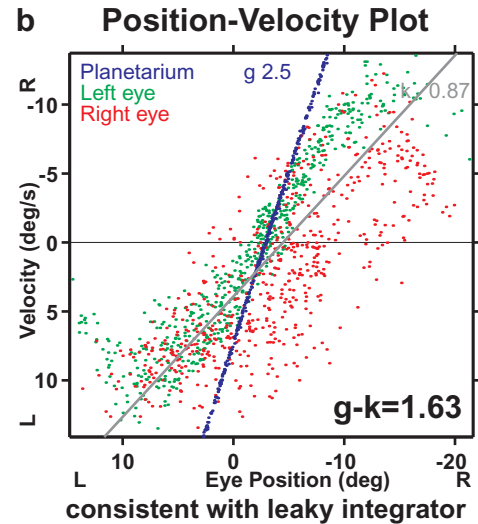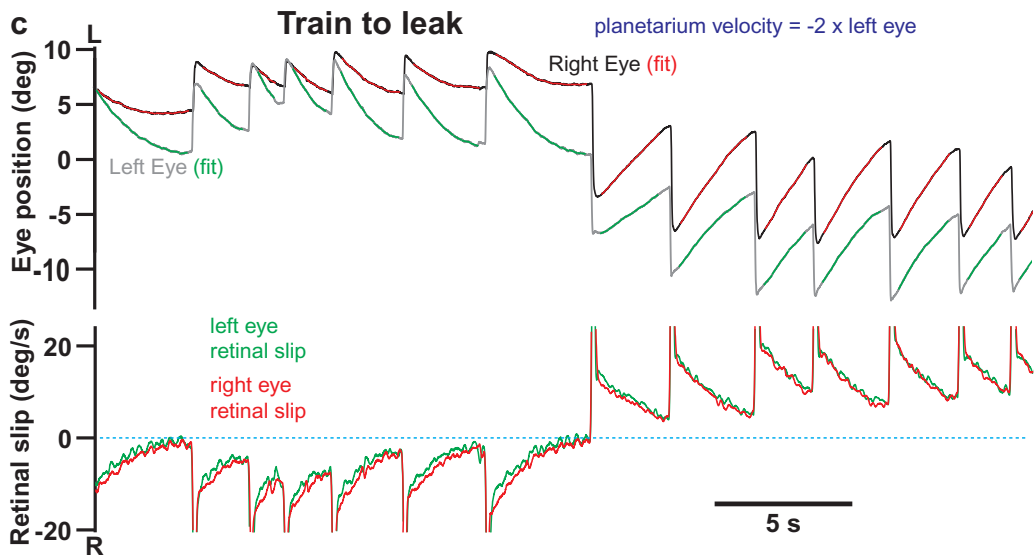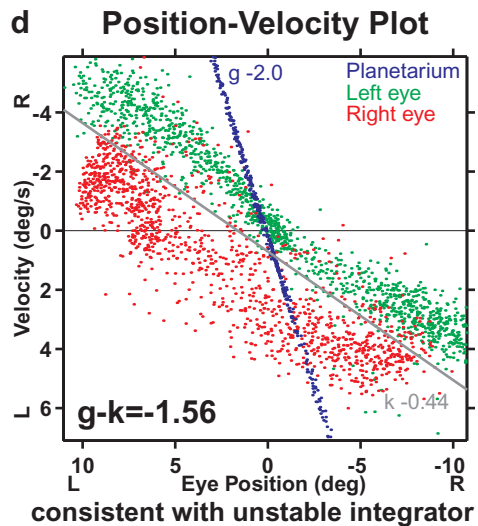

Supplement: pnas_101_20_7739__3.pdf [file pnas_101_20_7739__3.pdf]
